# Supplementary material for: Spatiotemporal Risk Assessment of Agricultural Drought Disasters in Aman Rice Growing Season in Western Bangladesh
Source: Research Square preprint supplement (doi:10.21203/rs.3.rs-1650345/v1), 2022-05-20
Supplement: Supplementary file 1 [file 3246da3be8f9dc77f344d024.docx]

**Table S1:** Classification scale of Aman paddy drought based on crop water deficit index (CWDI)

|  | Subregion (Northern) | Subregion (central) | Subregion (southern) |
| --- | --- | --- | --- |
| Mild drought | 60-70 | 50-6- | 40-50 |
| Moderate drought | 65-75 | 55-65 | 45-55 |
| Severe drought | 70-80 | 60-70 | 50-60 |

**Table S2:** Sub-region for the current study

| Subregion (Northern) | Rangpur, Rajshahi, Bogra |
| --- | --- |
| Subregion (central) | Faridpur |
| Subregion (southern) | Barishal, Khulna, Satkhira |

**Table S3**: The weight of drought risk assessment index during the Aman rice growing season

| Index | Weight | Subindex | Weight | Effect |
| --- | --- | --- | --- | --- |
| *DH* | 0.031. | 1) *CWDI* | 0.137 | + |
|  |  | 2) Drought frequency | 0.223 | + |
| *DS* | 0.283 | 1) Drought intensity | 0.331 | + |
|  |  | 2) Yield reduction rate | 0.385 | + |
| *ED* | 0.041 | 1) Cultivated area ratio | 0.104 | + |
| *PL* | 0.106 | 1) Per capita GDP | 0.035 | + |
|  |  | 2) Effective irrigation area | 0.712 | + |
|  |  | 3) Total power of agricultural machinery | 0.141 | + |

+ Indicated a positive effect
